# Supplementary material for: Relativistic reflection modeling in AGN and related variability from PCA: a brief review
Source: Frontiers journal article supplement (doi:10.3389/fspas.2024.1479301), 2024-10-25
Supplement: Data_Sheet_1.pdf [file Data_Sheet_1.pdf]

## Supplementary Material

### 1 THREE PCA METHODS IMPLEMENTED WITH NUMPY IN PYTHON

We can obtain the PCA components ( $U$ ), the eigenvectors ( $V$ ), and the eigenvalues ( $\Lambda = S^2$ ) of a  $m \times n$  matrix  $X$  via the following three methods with the NumPy linear algebra. Let consider  $X$  defined as:

```
import numpy as np
np.random.seed(50)
n = 3; m = 10
X = np.random.random((m, n))
```

**Singular Value Decomposition (SVD).** The SVD of  $X = USV^T$  can be conducted as follows:

```
U, S, VT = np.linalg.svd(X, full_matrices=False)
V = VT.T
eigenVectors = V
eigenValues = S**2
```

**Eigendecomposition.** The eigenvalue decomposition (EVD) of the covariance matrix  $C = X^T X = V \Lambda V^T$  and the least-squares solution ( $U$ ) to  $XV = US$  can be computed as follows:

```
C = np.dot(X.T, X)
eigenValues, eigenVectors = np.linalg.eigh(C)
idx_sort = eigenValues.argsort()[::-1]
eigenValues = eigenValues[idx_sort]
eigenVectors = eigenVectors[:, idx_sort]
S = eigenValues**0.5
V = eigenVectors
XV = np.dot(X, V)
UT, resid, rank, sv = np.linalg.lstsq(np.diag(S), XV.T, rcond=None)
U = UT.T
```

**QR Decomposition.** The QR decomposition of  $X = QR$  and the SVD of  $R^T = \bar{U} \bar{S} \bar{V}^T$  can also be implemented using the NumPy functions, leading to  $S = \bar{S}$ ,  $V = \bar{U}$ , and  $U = Q\bar{V}$ :

```
Q, R = np.linalg.qr(X)
U_bar, S_bar, VT_bar = np.linalg.svd(R.T)
V_bar = VT_bar.T
U = np.dot(Q, V_bar)
V = U_bar
S = S_bar
eigenVectors = V
eigenValues = S**2
```

These different methods can sometimes result in a sign difference in one PCA component and its eigenvector compared to each other.
